# Supplementary material for: Molecular Characterization of Staphylococcus aureus Isolated from Raw Milk Samples of Dairy Cows in Manhiça District, Southern Mozambique
Source: MDPI journal article supplement (doi:10.3390/microorganisms9081684), 2021-08-08
Supplement: s1 [file s1]

**Table S1.** Primers used in this study

| Target Gene                          | Primers              | Nucleotide Sequence (5'-3')      | Amplicon Size (bp) | Reference |
|--------------------------------------|----------------------|----------------------------------|--------------------|-----------|
| S. aureus identification             |                      |                                  |                    |           |
| nuc                                  | p <sub>nuc</sub> _Fw | GCGATTGATGGTGATACGGTT            | 270                | [1]       |
|                                      | p <sub>nuc</sub> _Rv | AGCCAAGCCTTGACGAACTAAAGC         |                    |           |
| Screening of resistance determinants |                      |                                  |                    |           |
| mecA                                 | mecA_Fw              | GGTCCCATTAACTCTGAAG              | 1040               | [2]       |
|                                      | mecA_Rv              | AGTTCTGCAGTACCGGATTTCG           |                    |           |
| blaZ                                 | blaZ_Fw              | GATAAGAGATTTCCTATGC              | 533                | [3]       |
|                                      | blaZ_Rv              | GCATATGTTATTGCTTGACC             |                    |           |
| erm(A)                               | erm(A)_Fw            | AAGCGGTAAACCCCTCTGAG             | 442                | [4]       |
|                                      | erm(A)_Rv            | AAGCGGTAAACCCCTCTGAG             |                    |           |
| erm(C)                               | erm(C)_Fw            | TCGTAAGTCCATTGAAATA              | 348                | [5]       |
|                                      | erm(C)_Rv            | TCACTTTAGGTTTAGGATGAAA           |                    |           |
| msr(A)                               | msr(A)_Fw            | GATTGTCCCAAGCCAGTAAA             | 445                | [6]       |
|                                      | msr(A)_Rv            | GCCATTTCGACTTTAGGAGA             |                    |           |
| tet(K)                               | tet(K)_Fw            | GTAGCGACAATAGGTAATAGT            | 361                | [7]       |
|                                      | tet(K)_Rv            | GTAGTGACAATAAACCTCCTA            |                    |           |
| tet(M)                               | tet(M)_Fw            | GTAAATAGTGTTCCTGGAG              | 657                | [8]       |
|                                      | tet(M)_Rv            | CTAAGATATGGCTCTAACAA             |                    |           |
| tet(L)                               | tet(L)_Fw            | GTCGGTAATTGGGTTTGTG              | 421                | [9]       |
|                                      | tet(L)_Rv            | TGACAGCACGCTAACGATAA             |                    |           |
| dfrG                                 | dfrG_Fw              | TTTCTTTGATTGCTGCGATG             | 501                | [10]      |
|                                      | dfrG_Rv              | AACGCACCCGTTAACTCAAT             |                    |           |
| dfrA(S1)                             | dfrA(S1)_Fw          | CACTTGTAATGGCACGGAAA             | 270                | [11]      |
|                                      | dfrA(S1)_Rv          | CGAATGTGTATGGTGGAAG              |                    |           |
| Virulence genes                      |                      |                                  |                    |           |
| sea                                  | sea-Fw               | ACGATCAATTTTACAGC                | 544                | [12]      |
|                                      | sea-Rv               | TGCATGTTTTCAGAGTTAATC            |                    |           |
| seb                                  | seb-Fw               | ATTCTATTAAGGACACTAAGTTAGGGGA     | 404                | [12]      |
|                                      | seb-Rv               | ATCCCGTTTCATAAGGCGAGT            |                    |           |
| sec                                  | sec-Fw               | GACATAAAAGCTAGGAATTT             | 257                | [12]      |
|                                      | sec-Rv               | AAATCGGATTAACATTATCCA            |                    |           |
| sed                                  | sed-Fw               | CAAATATATTGATATAATGA             | 330                | [12]      |
|                                      | sed-Rv               | AGTAAAAAAGAGTAATGCAA             |                    |           |
| see                                  | see-Fw               | CAAAGAAATGCTTTAAGCAATCTTAGGC     | 482                | [12]      |
|                                      | see-Rv               | CACCTTACCGCCAAAGCTG              |                    |           |
| tst                                  | tst-Fw               | ACCCCTGTTCCCTTATCATC             | 326                | [12]      |
|                                      | tst-Rv               | TTTTCAGTATTTGTAACGCC             |                    |           |
| lukF-lukS                            | luk-PV-Fw            | ATCATTAGGTAAAAATGTCTGGACATGATCCA | 433                | [13]      |
|                                      | luk-PV-Rv            | GCATCAASTGTATTGGATAGCAAAAAGC     |                    |           |
| spa typing                           |                      |                                  |                    |           |
| spa                                  | spa-1113-Fw          | TAAAGACGATCCTTCGGTGAGC           | 110-442            | [14]      |
|                                      | spa-1514-Rv          | CAGCAGTAGTGCCGTTTGCTT            |                    |           |

**bp:** base pair; **Fw:** "forward"; **Rv:** "reverse"

**Table S1.** Primers used in this study

| Target Gene | Primers | Nucleotide Sequence (5'-3') | Amplicon Size (bp) | Reference |
|-------------|---------|-----------------------------|--------------------|-----------|
| <b>MLST</b> |         |                             |                    |           |
| <i>arcC</i> | arcC_Fw | TTGATTACCAGCGGTATTGTC       | 456                | [15]      |
|             | arcC_Rv | AGGTATCTGCTCAATCAGCG        |                    |           |
| <i>aroE</i> | aroE_Fw | ATCGGAAATCCTATTTACATTC      | 456                | [15]      |
|             | aroE_Rv | GGTGTGTATTAATAACGATATC      |                    |           |
| <i>glpF</i> | glpF_Fw | CTAGGAACTGCAATCTTAATCC      | 465                | [15]      |
|             | glpF_Rv | TGGTAAAATCGCATGTCCAATTC     |                    |           |
| <i>gmk</i>  | gmk_Fw  | ATCGTTTTATCGGGACCATC        | 429                | [15]      |
|             | gmk_Rv  | TCATTAACCTACAACGTAATCGTA    |                    |           |
| <i>pta</i>  | pta_Fw  | GTAAAAATCGTATTACCTGAAGG     | 474                | [15]      |
|             | pta_Rv  | GACCTTTTGTGAAAAGCTTAA       |                    |           |
| <i>tpi</i>  | tpi_Fw  | TCGTTCAATTCTGAACGTCGTGAA    | 402                | [15]      |
|             | tpi_Rv  | TTTGACCTTCTAACAATTGTAC      |                    |           |
| <i>yqiL</i> | yqiL_Fw | CAGCATACAGGACACCTATTGGC     | 516                | [15]      |
|             | yqiL_Rv | CGTTGAGGAATCGATACTGGAAC     |                    |           |

bp: base pair; Fw: "forward"; Rv: "reverse"

## References

- Brakstad, O.G.; Aasbakk, K.; Maeland, J.A. Detection of *Staphylococcus Aureus* by Polymerase Chain Reaction Amplification of the Nuc Gene. *J. Clin. Microbiol.* **1992**, *30*, 1654–1660.
- Petinaki, E. Detection of *MecA*, *MecR1* and *MecI* Genes among Clinical Isolates of Methicillin-Resistant *Staphylococci* by Combined Polymerase Chain Reactions. *Journal of Antimicrobial Chemotherapy* **2001**, *47*, 297–304, doi:10.1093/jac/47.3.297.
- Milheiro, C.; Portelinha, A.; Krippahl, L.; de Lencastre, H.; Oliveira, D.C. Evidence for a Purifying Selection Acting on the  $\beta$ -Lactamase Locus in Epidemic Clones of Methicillin-Resistant *Staphylococcus Aureus*. *BMC Microbiol* **2011**, *11*, 76, doi:10.1186/1471-2180-11-76.
- Jensen, L.B.; Hammerum, A.M.; Bager, F.; Aarestrup, F.M. Streptogramin Resistance among *Enterococcus Faecium* Isolated from Production Animals in Denmark in 1997. *Microbial Drug Resistance* **2002**, *8*, 369–374, doi:10.1089/10766290260469642.
- Costa, S.S.; Palma, C.; Kadlec, K.; Fessler, A.T.; Viveiros, M.; Melo-Cristino, J.; Schwarz, S.; Couto, I. Plasmid-Borne Antimicrobial Resistance of *Staphylococcus Aureus* Isolated in a Hospital in Lisbon, Portugal. *Microbial Drug Resistance* **2016**, *22*, 617–626, doi:10.1089/mdr.2015.0352.
- Ferreira, C.; Costa, S.S.; Serrano, M.; Oliveira, K.; Trigueiro, G.; Pomba, C.; Couto, I. Clonal Lineages, Antimicrobial Resistance, and PVL Carriage of *Staphylococcus Aureus* Associated to Skin and Soft-Tissue Infections from Ambulatory Patients in Portugal. *Antibiotics* **2021**, *10*, 345, doi:10.3390/antibiotics10040345.
- Strommenger, B.; Kettlitz, C.; Werner, G.; Witte, W. Multiplex PCR Assay for Simultaneous Detection of Nine Clinically Relevant Antibiotic Resistance Genes in *Staphylococcus Aureus*. *J Clin Microbiol* **2003**, *41*, 4089–4094, doi:10.1128/JCM.41.9.4089-4094.2003.
- Aarestrup, F.M.; Agerso, Y.; Gerner-Smidt, P.; Madsen, M.; Jensen, L.B. Comparison of Antimicrobial Resistance Phenotypes and Resistance Genes in *Enterococcus Faecalis* and *Enterococcus Faecium* from

Humans in the Community, Broilers, and Pigs in Denmark. *Diagnostic Microbiology and Infectious Disease* **2000**, 37, 127–137, doi:10.1016/S0732-8893(00)00130-9.

9. Costa, S.S.; Oliveira, V.; Serrano, M.; Pomba, C.; Couto, I. Phenotypic and Molecular Traits of *Staphylococcus Coagulans* Associated with Canine Skin Infections in Portugal. *Antibiotics* **2021**, 10, 518, doi:10.3390/antibiotics10050518.
10. Couto, N.; Belas, A.; Couto, I.; Perreten, V.; Pomba, C. Genetic Relatedness, Antimicrobial and Biocide Susceptibility Comparative Analysis of Methicillin-Resistant and -Susceptible *Staphylococcus Pseudintermedius* from Portugal. *Microbial Drug Resistance* **2014**, 20, 364–371, doi:10.1089/mdr.2013.0043.
11. Argudín, M.A.; Tenhagen, B.-A.; Fetsch, A.; Sachsenröder, J.; Käsbohrer, A.; Schroeter, A.; Hammerl, J.A.; Hertwig, S.; Helmuth, R.; Bräunig, J.; et al. Virulence and Resistance Determinants of German *Staphylococcus Aureus* ST398 Isolates from Nonhuman Sources. *Appl. Environ. Microbiol.* **2011**, 77, 3052–3060, doi:10.1128/AEM.02260-10.
12. Wang, W.; Lin, X.; Jiang, T.; Peng, Z.; Xu, J.; Yi, L.; Li, F.; Fanning, S.; Baloch, Z. Prevalence and Characterization of *Staphylococcus Aureus* Cultured From Raw Milk Taken From Dairy Cows With Mastitis in Beijing, China. *Front. Microbiol.* **2018**, 9, 1123, doi:10.3389/fmicb.2018.01123.
13. Lina, G.; Piemont, Y.; Godail-Gamot, F.; Bes, M.; Peter, M.-O.; Gauduchon, V.; Vandenesch, F.; Etienne, J. Involvement of Panton-Valentine Leukocidin--Producing *Staphylococcus Aureus* in Primary Skin Infections and Pneumonia. *Clinical Infectious Diseases* **1999**, 29, 1128–1132, doi:10.1086/313461.
14. Aires-de-Sousa, M.; Boye, K.; de Lencastre, H.; Deplano, A.; Enright, M.C.; Etienne, J.; Friedrich, A.; Harmsen, D.; Holmes, A.; Huijsdens, X.W.; et al. High Interlaboratory Reproducibility of DNA Sequence-Based Typing of Bacteria in a Multicenter Study. *Journal of clinical microbiology* **2006**, 44, 619–21.
15. Enright, M.C.; Day, N.P.; Davies, C.E.; Peacock, S.J.; Spratt, B.G. Multilocus Sequence Typing for Characterization of Methicillin-Resistant and Methicillin-Susceptible Clones of *Staphylococcus Aureus*. *Journal of Clinical Microbiology* **2000**, 38, 1008–15.
